# Supplementary material for: Regulation of Protein Quality Control by UBE4B and LSD1 through p53-Mediated Transcription
Source: PLoS Biol. 2015 Apr 2;13(4):e1002114. doi: 10.1371/journal.pbio.1002114 (PMC4383508; doi:10.1371/journal.pbio.1002114)
Supplement: S1 Table — The human transcriptome microarray analysis was carried out in triplicates of four conditions, control shRNA (CTRL), LSD1 knockdown alone, UBE4B knockdown alone, and UBE4B+LSD1 double knockdown, all in the presence of misfolded SOD1G85R, as described in the Results and the Materials and Methods. This table contains six sheets (A–F) that summarize the upstream regulator analysis. (A) Activated upstream regulators with z-score ≥ 2.0 for each of the three knockdown conditions, LSD1 alone, UBE4B alone, and (UBE4B+LSD1), as compared with the control. A z-score over 2.0 indicates that the particular upstream regulator is significantly activated because its target genes are differentially regulated accordingly in the experimental dataset. Note that the expression levels of the upstream regulators are often not changed. (B) Upstream regulators in the double UBE4B+LSD1 knockdown cells, with stringent p-values of overlap (p < 0.005) but any z-score. Activation/inhibition of upstream regulators with z-score between -2.0 and +2.0 is considered statistically nonsignificant and therefore not predicted. Upstream regulators with z scores ≥2.0 and ≤–2.0 are considered in an “activated” or “inhibited” state, respectively. (C) Expression analysis of 130 p53 target genes that are differentially regulated in the UBE4B and LSD1 double knockdown compared with the control. 49 “activated” genes are those whose actual changes are in agreement with the predicted direction in the event of p53 activation. 35 “inhibited” genes are those whose actual changes are opposite to the predicted direction in the event of p53 activation. Another 44 “affected” genes are those that are differentially regulated in the experiment but without IPA-predicted directions. (D, E, F) Lists of all upstream regulators in each of the three knockdown conditions, LSD1 alone, UBE4B alone, and both, as compared with the control. (XLSX) [file pbio.1002114.s010.xlsx]

## Sheet: Sheet A
Upstream regulators with activation score z≥2.0 for each of the three knockdown conditions.
CTRL vs. LSD1					CTRL vs. UBE4B					CTRL vs. UBE4B + LSD1
Upstream Regulator	Fold Change	Molecule Type	Activation z-Score		Upstream Regulator	Fold Change	Molecule Type	Activation z-Score		Upstream Regulator	Fold Change	Molecule Type	Activation z-Score
TP53	1.087	transcription regulator	3.035		CD24	-1.003	other	2.922		TRIB3	-1.174	kinase	2.135
EGR2	-1.078	transcription regulator	2.724		POR	-1.047	enzyme	2.898		RBL2	1.247	other	2.549
IKBKG		kinase	2.563		TRIB3	-1.17	kinase	2.781		INSIG1	-1.463	other	2.434
Akt		group	2.52		MYOD1	-1.234	transcription regulator	2.748		ADIPOQ	-1.013	other	2.416
MYOD1	-1.093	transcription regulator	2.442		ERG	-1.116	transcription regulator	2.53		NKX2-5	-1.254	transcription regulator	2.4
BRCA1	1.009	transcription regulator	2.345		ALDH2	-1.188	enzyme	2.449		Retnlb		other	2.137
CD24	1.006	other	2.309		NPPB	-1.116	other	2.425		miR-155-5p		mature microRNA	2.113
Vegf		group	2.283		ZAP70	-1.073	kinase	2.414		MAPK14	-1.169	kinase	2.068
MAPK14	1.008	kinase	2.207		THRB	1.351	lig.-depen. nuclear recept.	2.364		SMARCB1	-1.152	transcription regulator	2.017
MYC	1.116	transcription regulator	2.193		Nr1h		group	2.219		TP53	1.155	transcription regulator	2.013
STAT5B	-1.132	transcription regulator	2.157		HBP1	-1.088	transcription regulator	2.216		NR0B2	-1.017	lig.-depen. nuclear recept.	2
STAT3	1.127	transcription regulator	2.063		NR0B2	-1.107	lig.-depen. nuclear recept.	2.2		IRF1	-1.188	transcription regulator	2
CHUK	1.014	kinase	2.035		TP73	1.032	transcription regulator	2.186
GATA4	1.057	transcription regulator	2		PTEN	1.24	phosphatase	2.132
CDKN1A	-1.034	kinase	2		SFTPA1	-1.044	transporter	2.111
TLR9	1.033	transmembrane receptor	2		TP53	1.144	transcription regulator	2.072
					ZEB2	-1.029	transcription regulator	2.067
					SOCS3	-1.066	phosphatase	2.029
					RBPJ	1.131	transcription regulator	2.017
					NELFB	-1.038	other	2
					CYP51A1	-1.271	enzyme	2

## Sheet: Sheet B
Upstream regulators in the double UBE4B+LSD1 knockdown cells, with stringent overlap p-values (p<0.005).
CTRL vs. LSD1 + UBE4B
Upstream Regulator	Fold Change	Molecule Type	Activation State	Activation z-Score	p-Value of Overlap
FOXO4	1.303	transcription regulator		1.817	4.16e-07
miR-21-5p		mature microRNA		-0.156	1.39e-06
miR-124-3p		mature microRNA		0.661	2.8e-06
SBDS	1.024	other			6.4e-05
miR-291a-3		mature microRNA		0.957	7.37e-05
ALDH2	-1.125	enzyme		1.667	0.000122
CD24	-1.045	other		-0.535	0.000124
mir-194	-1.072	microRNA			0.000157
SIN3A	-1.019	transcription regulator		1.000	0.000203
SLC29A1	-1.082	transporter		1.414	0.000231
GRHL2	1.06	transcription regulator		-1.633	0.000259
CYP1A1	1.372	enzyme		0.788	0.000624
NUPR1	-1.204	transcription regulator		0.441	0.000683
TRIB3	-1.174	kinase	Activated	2.135	0.000747
mir-210	1.023	microRNA		0.836	0.000889
SF3B2	1.111	other			0.00116
miR-155-5p		mature microRNA	Activated	2.113	0.00119
FGF8	1.036	growth factor	Inhibited	-2.656	0.0012
INSIG2	-1.026	other		1.314	0.0013
ADRB		group		1.777	0.00134
PHF1	1.009	transcription regulator			0.00144
HOXB3	1.213	transcription regulator	Inhibited	-2.183	0.00147
SCAP	1.086	other	Inhibited	-2.762	0.00181
SYVN1	-1.063	transporter	Inhibited	-2.449	0.00207
ESRRA	-1.304	ligand-dependent nuclear receptor		-1.474	0.00229
estro. recept.		group		-1.424	0.00229
MGEA5	1.078	enzyme		1.183	0.00248
ZNF217	1.123	transcription regulator		-0.102	0.00273
ATP7B	1.154	transporter		-1.897	0.00284
miR-1		mature microRNA		0.601	0.00308
FSH		complex		1.294	0.00323
ETV4	-1.488	transcription regulator		-0.651	0.00333
ZFYVE9	1.039	peptidase			0.00346
HRAS	-1.178	enzyme		0.372	0.00379
MBTPS1	-1.002	peptidase		-0.447	0.0039
mir-103	-1.055	microRNA		-1.103	0.0039
ERBB2	1.012	kinase		-0.713	0.00395
TAZ	-1.129	enzyme			0.00396
FOXO3	1.184	transcription regulator		0.054	0.0044
L1CAM	1.018	other			0.00461
SREBF2	-1.3	transcription regulator	Inhibited	-2.745	0.00474

## Sheet: Sheet C
Expression analysis of p53 target genes differentially regulated in the double knockdown (UBE4B+LSD1) compared with the control (Fold Change ≥1.2, p≤0.04).
	TP53 Target	Fold Change	Molecule Type	TP53
1	ACTA2	2.66	other	Activated
2	ANTXR1	1.287	transmembrane receptor	Activated
3	ANXA3	-1.562	enzyme	Activated
4	APOA1	-1.243	transporter	Activated
5	ARL6IP1	-1.209	other	Activated
6	BTG2	1.259	transcription regulator	Activated
7	C11orf82	1.212	other	Activated
8	C12orf5	1.337	enzyme	Activated
9	CASP3	-1.356	peptidase	Activated
10	CAV1	1.402	transmembrane receptor	Activated
11	CYFIP2	1.266	other	Activated
12	CYP1A1	1.372	enzyme	Activated
13	DRAM1	1.381	other	Activated
14	EIF4G3	1.211	translation regulator	Activated
15	FAS	2.083	transmembrane receptor	Activated
16	FDXR	1.217	enzyme	Activated
17	FKBP1B	1.328	enzyme	Activated
18	FSTL1	1.35	other	Activated
19	GDF15	1.3	growth factor	Activated
20	GRB2	-1.222	other	Activated
21	HDLBP	-1.205	transporter	Activated
22	IDH2	1.346	enzyme	Activated
23	IFI30	1.243	enzyme	Activated
24	LBR	-1.311	enzyme	Activated
25	MAP2K6	-1.243	kinase	Activated
26	MCM5	-1.208	enzyme	Activated
27	MDM2	1.315	transcription regulator	Activated
28	NR6A1	1.709	ligand-dependent nuclear receptor	Activated
29	P2RX4	1.317	ion channel	Activated
30	PARK2	1.345	enzyme	Activated
31	PBK	-1.329	kinase	Activated
32	PCCA	1.414	enzyme	Activated
33	PLAU	-1.201	peptidase	Activated
34	PLK2	1.296	kinase	Activated
35	PTP4A3	1.414	phosphatase	Activated
36	RB1CC1	1.204	other	Activated
37	RFC1	-1.252	transcription regulator	Activated
38	RFC3	-1.306	enzyme	Activated
39	RGS16	1.21	other	Activated
40	ROBO1	1.678	transmembrane receptor	Activated
41	S100A4	1.29	other	Activated
42	SESN1	1.254	other	Activated
43	SGK1	1.217	kinase	Activated
44	SPHK1	-1.206	kinase	Activated
45	SPTLC2	1.369	enzyme	Activated
46	STAG1	1.644	other	Activated
47	TDO2	-1.213	enzyme	Activated
48	TERT	-1.242	enzyme	Activated
49	TIMP2	-1.326	other	Activated
50	TP53I3	1.221	enzyme	Activated
51	VAPA	1.208	other	Activated
52	ADA	1.29	enzyme	Inhibited
53	ADH5	-1.474	enzyme	Inhibited
54	APAF1	-1.208	other	Inhibited
55	ATL3	-1.507	other	Inhibited
56	BNIP3	-1.412	other	Inhibited
57	CALU	-1.808	other	Inhibited
58	CCNG2	-1.347	other	Inhibited
59	CDH1	-1.212	other	Inhibited
60	CLU	-1.299	other	Inhibited
61	CNN2	-1.223	other	Inhibited
62	DCK	-1.263	kinase	Inhibited
63	DHCR24	-1.214	enzyme	Inhibited
64	DNAJA2	1.207	enzyme	Inhibited
65	DUSP1	-1.235	phosphatase	Inhibited
66	FAM3C	1.202	cytokine	Inhibited
67	HAS2	-1.276	enzyme	Inhibited
68	IDH1	-1.208	enzyme	Inhibited
69	LPIN1	-1.317	phosphatase	Inhibited
70	LPP	-1.351	other	Inhibited
71	MED13L	1.239	other	Inhibited
72	NAMPT	-1.231	cytokine	Inhibited
73	NANOG	1.262	transcription regulator	Inhibited
74	PDLIM5	-1.224	other	Inhibited
75	PMAIP1	-1.322	other	Inhibited
76	PRDX3	-1.399	enzyme	Inhibited
77	PRKAR2A	-1.457	kinase	Inhibited
78	PSEN2	1.312	peptidase	Inhibited
79	RRM2	1.316	enzyme	Inhibited
80	SESN2	-1.201	other	Inhibited
81	SLC6A6	1.382	transporter	Inhibited
82	SOCS2	1.412	other	Inhibited
83	STARD4	-1.367	transporter	Inhibited
84	TFPI2	-1.23	other	Inhibited
85	TJP1	1.201	other	Inhibited
86	TP53INP1	-1.422	other	Inhibited
87	ADRBK2	1.235	kinase	Affected
88	AP3B1	1.547	transporter	Affected
89	ARHGAP1	1.247	other	Affected
90	ARHGEF2	1.225	other	Affected
91	ASNS	-1.302	enzyme	Affected
92	CCNB1IP1	1.277	enzyme	Affected
93	CCND1	-1.371	other	Affected
94	CD47	1.254	transmembrane receptor	Affected
95	CHIC1	-1.312	other	Affected
96	COMT	1.55	enzyme	Affected
97	CYP51A1	-1.202	enzyme	Affected
98	CYR61	-1.291	other	Affected
99	DAPK3	-1.206	kinase	Affected
100	E2F8	-1.309	transcription regulator	Affected
101	EBAG9	-1.203	other	Affected
102	F11R	-1.309	other	Affected
103	FDPS	-1.289	enzyme	Affected
104	FUCA1	1.2	enzyme	Affected
105	GNA13	1.387	enzyme	Affected
106	GSK3B	-1.213	kinase	Affected
107	HMGB2	-1.376	transcription regulator	Affected
108	HMGCR	-1.379	enzyme	Affected
109	HMGCS1	-1.398	enzyme	Affected
110	IGFBP7	1.276	transporter	Affected
111	KITLG	1.327	growth factor	Affected
112	LMO3	-1.38	other	Affected
113	MAPK3	1.239	kinase	Affected
114	MAPK4	1.272	kinase	Affected
115	MVD	-1.232	enzyme	Affected
116	NARS	-1.267	enzyme	Affected
117	NFATC2IP	-1.228	other	Affected
118	NFKB2	-1.202	transcription regulator	Affected
119	PLEKHB2	-1.558	other	Affected
120	PROSC	1.239	enzyme	Affected
121	RAD51AP1	-1.579	other	Affected
122	RASSF2	1.333	other	Affected
123	RBL2	1.247	other	Affected
124	RPS6KA1	1.235	kinase	Affected
125	SEMA3C	-1.359	other	Affected
126	SLC19A2	-1.25	transporter	Affected
127	STAMBP	1.327	enzyme	Affected
128	TMEM43	-1.252	other	Affected
129	UBL3	1.272	other	Affected
130	YES1	1.24	kinase	Affected

## Sheet: Sheet D
List of all upstream regulators in the LSD1 knockdown compared with the control.
Upstream Regulator	Fold Change	Molecule Type	Predicted Activation State	Activation z-Score	p-Value of Overlap
CD24	1.006	other	Activated	2.309	1.82E-05
EGR2	-1.078	transcription regulator	Activated	2.724	3.43E-03
IKBKG		kinase	Activated	2.563	1.14E-02
Vegf		group	Activated	2.283	1.69E-02
BRCA1	1.009	transcription regulator	Activated	2.345	2.64E-02
MYOD1	-1.093	transcription regulator	Activated	2.442	6.83E-02
Akt		group	Activated	2.520	7.46E-02
CHUK	1.014	kinase	Activated	2.035	1.03E-01
TP53	1.087	transcription regulator	Activated	3.035	1.58E-01
MAPK14	1.008	kinase	Activated	2.207	1.67E-01
STAT5B	-1.132	transcription regulator	Activated	2.157	2.41E-01
GATA4	1.057	transcription regulator	Activated	2.000	4.23E-01
STAT3	1.127	transcription regulator	Activated	2.063	4.57E-01
CDKN1A	-1.034	kinase	Activated	2.000	5.09E-01
MYC	1.116	transcription regulator	Activated	2.193	1.00E00
TLR9	1.033	transmembrane receptor	Activated	2.000	1.00E00
Immunoglobulin		complex	Inhibited	-3.420	4.73E-03
ARHGDIG	1.012	other	Inhibited	-2.000	5.33E-03
UPF2	1.234	other	Inhibited	-2.236	5.88E-03
miR-16-5p (and other miRNAs w/seed AGCAGCA)		mature microRNA	Inhibited	-2.038	3.09E-02
CBFB	1.088	transcription regulator	Inhibited	-2.000	2.83E-01
PAX7	-1.041	transcription regulator		0.513	5.01E-05
CTBP1	-1.008	enzyme		-1.000	2.52E-04
miR-1 (and other miRNAs w/seed GGAAUGU)		mature microRNA		-0.547	2.95E-04
miR-124-3p (and other miRNAs w/seed AAGGCAC)		mature microRNA		0.984	6.72E-04
TG	-1.060	other		-0.878	7.90E-04
EGF	-1.002	growth factor		0.886	8.53E-04
CCND1	1.025	other		-0.213	1.20E-03
miR-21-5p (and other miRNAs w/seed AGCUUAU)		mature microRNA		-0.384	3.14E-03
HNRNPA2B1	1.022	other			3.54E-03
SOX11	-1.038	transcription regulator		-1.342	3.60E-03
OTX1	-1.003	transcription regulator			4.73E-03
KEAP1	-1.025	transcription regulator			4.73E-03
PEA15	1.318	transporter			4.73E-03
GFRA2	-1.125	transmembrane receptor			4.86E-03
GDF5	1.096	growth factor			4.86E-03
Sirt1		transcription regulator			4.86E-03
Prl3b1		growth factor			4.86E-03
ADRB		group		0.905	6.16E-03
miR-92a-3p (and other miRNAs w/seed AUUGCAC)		mature microRNA		1.000	6.54E-03
PITX1	-1.120	transcription regulator			8.74E-03
GDNF	-1.121	growth factor		0.012	9.04E-03
NRG1	-1.002	growth factor		-0.093	9.05E-03
KLF16	-1.074	transcription regulator			9.45E-03
Prl3d1 (includes others)		other			9.45E-03
PLAGL2	1.014	transcription regulator			9.45E-03
PPP5C	1.009	phosphatase			9.45E-03
TAZ	-1.109	enzyme			9.91E-03
UPF1	1.102	enzyme			1.13E-02
KISS1R	-1.083	G-protein coupled receptor			1.13E-02
BCR (complex)		complex		0.557	1.27E-02
NRG2	-1.054	growth factor			1.40E-02
CDH11	-1.001	other		-0.152	1.53E-02
BICC1	-1.339	other			1.53E-02
7S NGF		complex			1.53E-02
DYNLL1	1.072	other			1.53E-02
GTF2H4	1.100	transcription regulator			1.53E-02
ARNT2	-1.047	transcription regulator		0.535	1.59E-02
ERBB2	1.012	kinase		1.250	1.61E-02
ANXA2	-1.075	other		-1.067	1.76E-02
EIF2S1	1.090	translation regulator			1.76E-02
MGEA5	1.119	enzyme		-1.000	1.80E-02
Pkc(s)		group		0.536	1.83E-02
NCOA3	1.340	transcription regulator		0.776	1.87E-02
SIM1	-1.003	transcription regulator		0.535	1.89E-02
GC-GCR dimer		complex			2.14E-02
FSHB	-1.096	other			2.14E-02
PLAG1	1.122	transcription regulator		-0.548	2.22E-02
PDZK1IP1	-1.084	other			2.24E-02
LMO4	-1.140	transcription regulator			2.24E-02
AIP	-1.060	transcription regulator			2.24E-02
CR2	1.093	transmembrane receptor			2.24E-02
TFF2	-1.046	other			2.24E-02
TBL1XR1	-1.027	transcription regulator			2.24E-02
FASLG	-1.008	cytokine		-1.033	2.29E-02
S100A6	-1.163	transporter		-1.000	2.59E-02
RTN4	-1.220	other		0.555	2.73E-02
NCOA2	1.086	transcription regulator		0.555	2.73E-02
IKBKB	-1.087	kinase		0.806	2.76E-02
F2	1.095	peptidase		-0.416	2.79E-02
HDAC3	1.052	transcription regulator			2.99E-02
NR2C2	-1.045	ligand-dependent nuclear receptor			3.00E-02
ASCL2	-1.016	transcription regulator			3.05E-02
miR-138-5p (miRNAs w/seed GCUGGUG)		mature microRNA			3.05E-02
miR-185-5p (and other miRNAs w/seed GGAGAGA)		mature microRNA			3.05E-02
MYCBP	-1.010	transcription regulator			3.05E-02
MLH1	-1.000	enzyme			3.05E-02
AKT1	-1.060	kinase		1.561	3.09E-02
HDAC4	-1.039	transcription regulator			3.11E-02
SIN3A	-1.001	transcription regulator			3.27E-02
estrogen receptor		group		-1.221	3.42E-02
IGF2BP1	-1.022	translation regulator			3.50E-02
IRF6	1.027	transcription regulator			3.61E-02
Calcineurin protein(s)		complex		1.522	3.86E-02
ZBTB10	1.094	other			3.96E-02
CPT1C	-1.073	enzyme			3.96E-02
EIF4G2	1.078	translation regulator			3.96E-02
FANCA	1.018	other			3.96E-02
RNF40	1.119	enzyme			3.96E-02
CSNK2A1	-1.032	kinase			3.96E-02
ATG5	-1.002	other			3.96E-02
CCNT1	1.031	transcription regulator			3.96E-02
TBL1X	-1.026	transcription regulator			3.96E-02
HIF1A	1.026	transcription regulator		-0.742	4.01E-02
FOS	-1.121	transcription regulator		0.665	4.02E-02
CDK4	-1.075	kinase			4.03E-02
SLC29A1	-1.043	transporter			4.03E-02
CDC14B	1.189	phosphatase			4.08E-02
CDK4/6		group			4.08E-02
ATM/ATR		group			4.08E-02
Esr1-Estrogen-Fos-Jun		complex			4.08E-02
DNAJ		group			4.08E-02
DNAH5	1.016	enzyme			4.08E-02
EGFLAM	-1.076	other			4.08E-02
NOC3L	1.141	other			4.08E-02
ADTRP	1.109	other			4.08E-02
SETD1A	-1.005	ion channel			4.08E-02
WWC1	-1.026	transcription regulator			4.08E-02
CLDN9	1.124	other			4.08E-02
B3GALT1	-1.058	enzyme			4.08E-02
ALG1	1.056	enzyme			4.08E-02
CIRBP	1.096	translation regulator			4.08E-02
BAHD1	1.114	other			4.08E-02
CA1	-1.070	enzyme			4.08E-02
PHF10	1.051	other			4.08E-02
LIN7A	1.018	other			4.08E-02
AHRR	-1.048	other			4.08E-02
NOL3	-1.031	other			4.08E-02
CLN3	1.004	other			4.08E-02
NEFM	1.114	other			4.08E-02
SYMPK	-1.006	other			4.08E-02
TRIM16	-1.158	transcription regulator			4.08E-02
RAET1E	-1.118	other			4.08E-02
ARID3A	-1.191	transcription regulator			4.08E-02
CHRM2	-1.015	G-protein coupled receptor			4.08E-02
miR-512-3p (and other miRNAs w/seed AGUGCUG)		mature microRNA			4.08E-02
miR-616-3p (miRNAs w/seed GUCAUUG)		mature microRNA			4.08E-02
WSB1	1.041	other			4.08E-02
ABHD5	1.100	enzyme			4.08E-02
DNM1L	-1.023	enzyme			4.08E-02
PUS1	1.043	enzyme			4.08E-02
GLUL	1.008	enzyme			4.08E-02
SLC30A9	1.135	transporter			4.08E-02
LINC00853		other			4.08E-02
COL4A2	1.081	other			4.08E-02
ETF1	1.107	translation regulator			4.08E-02
INPP5K	-1.059	phosphatase			4.08E-02
PTGIS	1.037	enzyme			4.08E-02
H19	-1.091	other			4.08E-02
PCGF1	-1.097	other			4.08E-02
NAPB	1.222	transporter			4.08E-02
RPS6KA2	1.026	kinase			4.08E-02
SERPINB4	-1.041	other			4.08E-02
MICA	-1.042	other			4.08E-02
TAS1R2	-1.040	G-protein coupled receptor			4.08E-02
IGF2BP3	1.058	translation regulator			4.08E-02
LARGE	1.017	enzyme			4.08E-02
S100A2	1.200	other			4.08E-02
GCDH	1.206	enzyme			4.08E-02
TCEB3	1.007	transcription regulator			4.08E-02
BARX1	-1.155	transcription regulator			4.08E-02
MED17	1.018	transcription regulator			4.08E-02
SLC25A10	1.014	transporter			4.08E-02
LIN7B	-1.054	other			4.08E-02
TRIP11	1.177	transcription regulator			4.08E-02
HCST	-1.104	transmembrane receptor			4.08E-02
LHX4	-1.034	transcription regulator			4.08E-02
NEUROG3	-1.019	transcription regulator		-0.816	4.31E-02
SYVN1	-1.062	transporter		1.897	4.40E-02
Nfat (family)		group		1.342	4.47E-02
GRP	-1.046	growth factor			4.60E-02
PGF	1.027	growth factor			4.60E-02
MAT1A	1.031	enzyme			4.60E-02
IFIH1	-1.083	enzyme			4.60E-02
NTRK1	-1.097	kinase			4.60E-02
BCL2	-1.063	transporter		-1.236	4.73E-02
LIPE	1.144	enzyme			4.79E-02
Gcn5l		group			4.95E-02
TARDBP	1.096	transcription regulator			4.95E-02
KISS1	-1.083	other			4.95E-02
PRMT1	1.099	enzyme			4.95E-02
GBX2	1.006	transcription regulator			4.95E-02
COPS8	1.054	other			4.95E-02
TFAP2A	1.067	transcription regulator			5.00E-02
NR0B2	-1.031	ligand-dependent nuclear receptor		1.949	5.23E-02
NKX2-5	-1.170	transcription regulator		1.869	6.28E-02
NOTCH1	1.059	transcription regulator		1.755	8.16E-02
STAT5A	1.027	transcription regulator		1.912	2.07E-01
IL10	-1.047	cytokine		1.933	4.73E-01
SHH	-1.057	peptidase		1.982	1.00E00
RELA	-1.063	transcription regulator		1.780	1.00E00
PPARA	-1.142	ligand-dependent nuclear receptor		-1.789	1.00E00

## Sheet: Sheet E
List of all upstream regulators in the single UBE4B knockdown compared with the control.
Upstream Regulator	Fold Change	Molecule Type	Predicted Activation State	Activation z-score	p-value of overlap
CD24	-1.003	other	Activated	2.922	4.69E-05
ZEB2	-1.029	transcription regulator	Activated	2.067	3.46E-04
POR	-1.047	enzyme	Activated	2.898	8.17E-04
HBP1	-1.088	transcription regulator	Activated	2.216	1.24E-03
TRIB3	-1.170	kinase	Activated	2.781	3.78E-03
ALDH2	-1.188	enzyme	Activated	2.449	1.49E-02
TP53	1.144	transcription regulator	Activated	2.072	3.24E-02
TP73	1.032	transcription regulator	Activated	2.186	4.57E-02
NELFB	-1.038	other	Activated	2.000	5.32E-02
CYP51A1	-1.271	enzyme	Activated	2.000	6.95E-02
PTEN	1.240	phosphatase	Activated	2.132	7.51E-02
NPPB	-1.116	other	Activated	2.425	1.13E-01
NR0B2	-1.107	ligand-dependent nuclear receptor	Activated	2.200	1.68E-01
SFTPA1	-1.044	transporter	Activated	2.111	2.42E-01
MYOD1	-1.234	transcription regulator	Activated	2.748	2.93E-01
THRB	1.351	ligand-dependent nuclear receptor	Activated	2.364	3.63E-01
SOCS3	-1.066	phosphatase	Activated	2.029	4.04E-01
ERG	-1.116	transcription regulator	Activated	2.530	1.00E00
ZAP70	-1.073	kinase	Activated	2.414	1.00E00
Nr1h		group	Activated	2.219	1.00E00
RBPJ	1.131	transcription regulator	Activated	2.017	1.00E00
estrogen receptor		group	Inhibited	-3.535	8.76E-04
NUPR1	-1.225	transcription regulator	Inhibited	-4.960	6.87E-03
BDNF	-1.268	growth factor	Inhibited	-2.864	9.92E-03
F2	-1.044	peptidase	Inhibited	-2.093	1.32E-02
SCAP	1.040	other	Inhibited	-2.745	1.34E-02
GNRH		group	Inhibited	-2.447	1.39E-02
GDF9	-1.098	growth factor	Inhibited	-2.418	1.49E-02
Pdgf (complex)		complex	Inhibited	-2.546	1.51E-02
Mek		group	Inhibited	-2.008	1.94E-02
ATF4	-1.111	transcription regulator	Inhibited	-2.298	2.23E-02
EPHB1	1.173	kinase	Inhibited	-2.000	2.77E-02
Nos		group	Inhibited	-2.000	2.77E-02
NRG1	1.012	growth factor	Inhibited	-3.141	2.82E-02
EGF	-1.121	growth factor	Inhibited	-2.779	3.56E-02
AGT	1.005	growth factor	Inhibited	-2.807	4.54E-02
F2R	1.032	G-protein coupled receptor	Inhibited	-2.025	4.87E-02
PDGFB	-1.041	growth factor	Inhibited	-2.384	4.87E-02
SIRT2	1.323	transcription regulator	Inhibited	-2.000	5.32E-02
Pka		complex	Inhibited	-2.103	5.76E-02
PDGF BB		complex	Inhibited	-4.137	8.68E-02
GRP	-1.073	growth factor	Inhibited	-2.198	9.58E-02
Lh		complex	Inhibited	-2.587	9.77E-02
IL3	-1.111	cytokine	Inhibited	-2.276	9.85E-02
VEGFA	-1.049	growth factor	Inhibited	-2.722	1.01E-01
NMDA Receptor		complex	Inhibited	-2.000	1.09E-01
FGF8	-1.079	growth factor	Inhibited	-2.758	1.20E-01
ERK		group	Inhibited	-2.261	1.26E-01
Mapk		group	Inhibited	-2.399	1.33E-01
MAP2K1	-1.101	kinase	Inhibited	-2.280	1.40E-01
IL5	1.123	cytokine	Inhibited	-2.057	1.84E-01
F7	-1.086	peptidase	Inhibited	-2.385	1.85E-01
HGF	1.072	growth factor	Inhibited	-2.525	2.02E-01
ERK1/2		group	Inhibited	-2.199	2.07E-01
CREB1	1.109	transcription regulator	Inhibited	-3.758	2.16E-01
PRKD1	1.037	kinase	Inhibited	-2.000	2.20E-01
SREBF1	-1.001	transcription regulator	Inhibited	-2.127	2.33E-01
THRA	1.231	ligand-dependent nuclear receptor	Inhibited	-2.169	2.39E-01
STAT6	1.010	transcription regulator	Inhibited	-2.062	2.43E-01
NEUROD1	-1.187	transcription regulator	Inhibited	-2.209	2.70E-01
Creb		group	Inhibited	-2.747	2.71E-01
MAP2K1/2		group	Inhibited	-2.595	2.86E-01
ATF2	-1.027	transcription regulator	Inhibited	-2.217	3.11E-01
DDX58	1.138	enzyme	Inhibited	-2.200	3.16E-01
PI3K (complex)		complex	Inhibited	-2.000	3.51E-01
SHH	-1.244	peptidase	Inhibited	-2.455	3.55E-01
IGF1	-1.107	growth factor	Inhibited	-2.059	3.89E-01
TNFSF12	1.025	cytokine	Inhibited	-2.178	3.92E-01
TCR		complex	Inhibited	-2.140	4.79E-01
TNFSF13B	1.050	cytokine	Inhibited	-2.184	5.02E-01
A2M	-1.003	transporter	Inhibited	-2.000	5.29E-01
PPRC1	1.069	transcription regulator	Inhibited	-2.000	1.00E00
NFKB1	1.082	transcription regulator	Inhibited	-2.043	1.00E00
NFkB (complex)		complex	Inhibited	-2.066	1.00E00
POMC	1.082	other	Inhibited	-2.072	1.00E00
STAT5A	1.003	transcription regulator	Inhibited	-2.220	1.00E00
MYD88	-1.221	other	Inhibited	-2.231	1.00E00
CTNNB1	1.150	transcription regulator	Inhibited	-2.238	1.00E00
IL2	-1.003	cytokine	Inhibited	-2.238	1.00E00
IL1A	-1.112	cytokine	Inhibited	-2.285	1.00E00
CSF1	1.099	cytokine	Inhibited	-2.349	1.00E00
IKBKG		kinase	Inhibited	-2.383	1.00E00
Jnk		group	Inhibited	-2.403	1.00E00
IL15	-1.036	cytokine	Inhibited	-2.500	1.00E00
Ins1		other	Inhibited	-2.555	1.00E00
MAPK1	-1.013	kinase	Inhibited	-2.738	1.00E00
GLI1	-1.124	transcription regulator	Inhibited	-2.750	1.00E00
TGM2	-1.142	enzyme	Inhibited	-2.770	1.00E00
IL6	-1.050	cytokine	Inhibited	-2.813	1.00E00
TICAM1	-1.140	other	Inhibited	-2.878	1.00E00
FOXO4	1.226	transcription regulator		1.953	3.98E-07
ERBB3	1.029	kinase		-1.315	2.15E-04
SBDS	1.021	other			2.45E-04
ZFYVE9	1.132	peptidase		0.000	2.46E-04
DRD1	-1.166	G-protein coupled receptor		-1.004	5.15E-04
NGF	-1.152	growth factor		-0.755	8.15E-04
HMGA1	-1.263	transcription regulator		1.027	8.19E-04
mir-210	-1.148	microRNA		0.767	8.52E-04
RND3	1.100	enzyme		-0.447	1.01E-03
GTF2H4	-1.003	transcription regulator			1.11E-03
Fcor		enzyme		-1.183	1.24E-03
mir-17	-1.101	microRNA		-1.748	1.32E-03
ADRA1A		G-protein coupled receptor			1.74E-03
miR-124-3p (and other miRNAs w/seed AAGGCAC)		mature microRNA		0.607	1.75E-03
GFRA2	-1.093	transmembrane receptor			1.97E-03
INSIG1	-1.442	other		1.782	1.97E-03
miR-291a-3p (and other miRNAs w/seed AAGUGCU)		mature microRNA		0.115	2.10E-03
ADRB		group		1.231	2.13E-03
ADRA1B	-1.072	G-protein coupled receptor			2.19E-03
BCAR1	-1.061	enzyme			2.51E-03
NPC1	1.032	transporter		-1.336	2.78E-03
FGFR4	1.011	kinase			2.99E-03
MGEA5	1.190	enzyme		1.234	3.10E-03
Calcineurin protein(s)		complex		0.801	3.37E-03
ETV4	-1.581	transcription regulator		-0.274	4.24E-03
AZGP1	-1.288	transporter		-0.973	4.35E-03
IRS1	-1.099	enzyme		-1.208	4.38E-03
S1PR2	-1.255	G-protein coupled receptor		-1.133	4.50E-03
INSIG2	-1.013	other		1.314	4.71E-03
Cyclin E		group		0.808	4.71E-03
miR-21-5p (and other miRNAs w/seed AGCUUAU)		mature microRNA		-1.436	5.04E-03
GAST	-1.008	other		-1.223	5.53E-03
SLC29A1	-1.029	transporter		1.890	6.15E-03
MNT	-1.052	transcription regulator			6.15E-03
PIWIL2	1.035	other		-0.343	6.29E-03
TNRC6A	1.170	other		-0.577	6.29E-03
FOXO3	-1.112	transcription regulator		0.942	6.63E-03
GPER	-1.121	G-protein coupled receptor		-0.854	7.03E-03
AKAP12	1.038	transporter			7.13E-03
TCL1A	-1.214	transcription regulator			7.13E-03
NDN	-1.035	other		-0.447	7.40E-03
GPI	-1.063	enzyme		-1.160	7.40E-03
SREBF2	-1.221	transcription regulator		-0.894	7.54E-03
BRCA1	1.122	transcription regulator		0.072	7.69E-03
miR-16-5p (and other miRNAs w/seed AGCAGCA)		mature microRNA		-1.202	7.71E-03
RARA	-1.046	ligand-dependent nuclear receptor		0.706	8.10E-03
ABL1	1.052	kinase		-0.822	9.06E-03
ANXA2	-1.034	other		-1.129	9.06E-03
mir-155		microRNA		-0.612	9.31E-03
NEUROG3	1.029	transcription regulator		-1.044	9.77E-03
ACVR1C	1.193	kinase		0.000	1.01E-02
miR-155-5p (miRNAs w/seed UAAUGCU)		mature microRNA		1.693	1.02E-02
WNT1	-1.185	cytokine		-1.915	1.11E-02
SHOX	-1.215	transcription regulator			1.13E-02
Igkv1-117		other			1.13E-02
MST1R		kinase		0.537	1.14E-02
GTF2I	1.206	transcription regulator		-0.358	1.14E-02
ZNF217	1.360	transcription regulator		-0.389	1.16E-02
EPAS1	1.028	transcription regulator		0.331	1.27E-02
Notch		group		-0.026	1.27E-02
Hmga1		transcription regulator		-1.216	1.28E-02
ERBB2	1.032	kinase		-1.991	1.35E-02
HRAS	-1.132	enzyme		-0.507	1.37E-02
CTSB	-1.204	peptidase		-0.000	1.39E-02
NFATC3	1.111	transcription regulator		-1.789	1.42E-02
HDAC3	1.043	transcription regulator		-0.163	1.48E-02
RPS6KB1	1.071	kinase		-0.817	1.49E-02
CNOT6L	1.081	enzyme			1.57E-02
TMEM8B		other			1.57E-02
GPR68	-1.153	G-protein coupled receptor			1.57E-02
MAPK8IP2	-1.375	other			1.57E-02
RBBP7	-1.000	transcription regulator			1.57E-02
RAP1GAP	-1.216	other			1.57E-02
ATP1A1	1.089	transporter			1.57E-02
BPTF	1.070	transcription regulator			1.57E-02
Pvr		other			1.57E-02
UTS2	-1.033	other			1.57E-02
CYP2C9	-1.024	enzyme			1.57E-02
PRKRA	1.208	other			1.57E-02
ARAF	1.144	kinase			1.57E-02
CBR1	1.063	enzyme			1.57E-02
RAB7A	-1.047	enzyme			1.57E-02
NTRK2	-1.017	kinase		0.478	1.61E-02
ATP7B	1.098	transporter		-1.897	1.61E-02
KHSRP	-1.099	enzyme			1.62E-02
JARID2	1.196	transcription regulator			1.62E-02
CDH4	-1.098	other			1.62E-02
AFF1	-1.080	transcription regulator			1.62E-02
TP53BP2	1.116	other			1.62E-02
NOTCH1	1.063	transcription regulator		-0.613	1.65E-02
miR-210-3p (miRNAs w/seed UGUGCGU)		mature microRNA		1.446	1.66E-02
FGF1	-1.147	growth factor		-0.912	1.77E-02
PBRM1	1.110	other			1.84E-02
PIAS2	-1.018	transcription regulator			1.84E-02
GBX2	-1.194	transcription regulator			1.84E-02
S100A6	-1.249	transporter		0.707	1.85E-02
LRP6	-1.028	transmembrane receptor		-0.492	1.87E-02
EGR1	-1.464	transcription regulator		-1.980	1.95E-02
CDKN2A	1.001	transcription regulator		0.466	2.15E-02
BCL2	-1.004	transporter		-0.414	2.16E-02
IGF2	1.082	growth factor		0.144	2.22E-02
ADRA1D	-1.149	G-protein coupled receptor			2.30E-02
ACACB	1.068	enzyme		1.172	2.32E-02
GNB2L1	1.087	enzyme		-0.468	2.32E-02
HTT	1.016	transcription regulator		-0.915	2.40E-02
EP300	1.232	transcription regulator		-1.220	2.43E-02
COMMD1	1.280	transporter		1.408	2.46E-02
MST1	-1.153	growth factor		0.743	2.46E-02
GDNF	-1.110	growth factor		-1.288	2.52E-02
PAX7	-1.081	transcription regulator		1.424	2.52E-02
FAS	2.029	transmembrane receptor		0.019	2.64E-02
HNRNPAB	-1.000	enzyme		0.000	2.77E-02
CDH2	-1.041	other		-0.106	2.77E-02
miR-451a (and other miRNAs w/seed AACCGUU)		mature microRNA		-0.784	2.77E-02
AFP	-1.155	transporter		-1.192	2.77E-02
NR2E3	-1.051	ligand-dependent nuclear receptor			2.77E-02
SUMO2	-1.122	other		-0.000	2.78E-02
SMAD1	1.158	transcription regulator		-0.765	2.78E-02
POU5F1	-1.169	transcription regulator		-0.574	2.91E-02
N-Cadherin		group			2.93E-02
CACNA1C	-1.084	ion channel			2.93E-02
HINFP	-1.114	transcription regulator			2.93E-02
PTBP1	1.083	enzyme			2.93E-02
mir-214		microRNA			2.93E-02
CCND2	-1.226	other			2.93E-02
PROK1	-1.106	growth factor			2.93E-02
OXSR1	1.190	kinase			2.93E-02
NPC1L1	-1.012	transporter			2.93E-02
FZR1	-1.044	kinase			2.93E-02
TFF2	-1.214	other			2.93E-02
CDH13	-1.032	other			2.93E-02
ABCA1	1.177	transporter		0.421	3.00E-02
FSH		complex		-0.431	3.03E-02
KCNIP3	-1.144	transcription regulator		1.890	3.13E-02
AXIN1	-1.016	other		1.452	3.13E-02
CTBP2	-1.030	transcription regulator			3.13E-02
PLAG1	1.077	transcription regulator		-0.792	3.27E-02
PXR ligand-PXR-Retinoic acid-RXRα		complex		1.369	3.35E-02
RARG	-1.036	ligand-dependent nuclear receptor		0.124	3.35E-02
INHA	-1.049	growth factor		-0.177	3.41E-02
TGFB3	-1.024	growth factor		-0.698	3.43E-02
KNG1	-1.079	other		-1.556	3.67E-02
MAP2K4	-1.056	kinase		-0.415	3.73E-02
miR-19b-3p (and other miRNAs w/seed GUGCAAA)		mature microRNA		-0.100	3.93E-02
CHRM1	-1.149	G-protein coupled receptor		-1.981	3.93E-02
ELK4	1.127	transcription regulator			3.93E-02
TRRAP	1.034	transcription regulator			3.93E-02
TYK2	1.217	kinase		-0.776	3.95E-02
CDKN1C	-1.079	other		-1.000	3.95E-02
PCDH11X/PCDH11Y	1.051	other		-1.698	3.95E-02
SUMO3	-1.421	other		-0.000	3.99E-02
Ras homolog		group		-0.985	4.10E-02
AChR		complex			4.10E-02
SMAD2	1.345	transcription regulator		-0.778	4.14E-02
RUVBL1	1.014	transcription regulator		-0.378	4.17E-02
TRAF3	1.109	enzyme		0.093	4.22E-02
SIN3A	1.005	transcription regulator			4.25E-02
Pld		group			4.32E-02
F Actin		complex			4.32E-02
SLC22A2	-1.061	transporter			4.32E-02
ACTA2	2.497	other			4.32E-02
NOP58	1.060	enzyme			4.32E-02
Fascin		group			4.32E-02
C1QL1	-1.182	other			4.32E-02
TEX11	1.010	other			4.32E-02
NAA30	-1.052	other			4.32E-02
BLOC1S5		other			4.32E-02
DTNBP1	1.047	other			4.32E-02
GRB2	-1.186	other			4.32E-02
Atf		group			4.32E-02
ARHGEF1	1.002	other			4.32E-02
MZB1	-1.223	other			4.32E-02
ZIC1	-1.269	transcription regulator			4.32E-02
EMP2	1.074	other			4.32E-02
SERPINA3	-1.202	other			4.32E-02
PSMC5	1.031	transcription regulator			4.32E-02
HMGCR	-1.294	enzyme			4.32E-02
mir-183	1.089	microRNA			4.32E-02
SEMA3A	1.427	other			4.32E-02
RALGDS	1.030	other			4.32E-02
GNAO1	-1.372	enzyme			4.32E-02
MAPKAP1	1.109	other			4.32E-02
NPAT	1.102	transcription regulator			4.32E-02
IQGAP2	-1.035	other			4.32E-02
SIGMAR1	1.032	G-protein coupled receptor			4.32E-02
BMX	-1.009	kinase			4.32E-02
PIK3R3	1.078	kinase			4.32E-02
RGD1560225		other			4.32E-02
F2RL3	-1.193	G-protein coupled receptor			4.32E-02
PPP1CA	-1.029	phosphatase			4.32E-02
SLC9A3R2	-1.112	transporter			4.32E-02
RING1	1.280	transcription regulator			4.32E-02
NOC2L	-1.096	transcription regulator			4.32E-02
CREM		transcription regulator		-0.544	4.34E-02
TERC	-1.106	other			4.44E-02
Pkc(s)		group		-1.501	4.63E-02
Actin		group			4.66E-02
L-type Calcium Channel		complex			4.66E-02
NODAL	-1.146	growth factor			4.66E-02
GNE	1.038	kinase			4.66E-02
mir-194	-1.203	microRNA			4.66E-02
miR-138-5p (miRNAs w/seed GCUGGUG)		mature microRNA			4.66E-02
MYCBP	-1.054	transcription regulator			4.66E-02
MLH1	-1.019	enzyme			4.66E-02
LCAT	-1.113	enzyme			4.66E-02
BRD7	1.160	transcription regulator			4.66E-02
ITGB1BP1	1.091	other			4.66E-02
TFF3	-1.019	other			4.66E-02
RETN	-1.277	other		0.943	4.71E-02
Rock		group		-0.896	4.71E-02
miR-17-5p (and other miRNAs w/seed AAAGUGC)		mature microRNA		-0.386	4.84E-02
ATM	1.311	kinase		-1.869	4.84E-02
HIPK2	1.015	kinase		-0.492	4.84E-02
NPPA	-1.030	other		1.516	4.88E-02
Ikb		group		-0.187	4.88E-02
miR-221-3p (and other miRNAs w/seed GCUACAU)		mature microRNA		-0.938	4.88E-02
CAV1	1.620	transmembrane receptor		0.004	4.88E-02
IFNA2	-1.153	cytokine		0.317	4.99E-02
PTGFR	-1.116	G-protein coupled receptor		-1.982	5.32E-02
PRKCA	1.046	kinase		-1.795	6.15E-02
SYVN1	-1.062	transporter		-1.877	6.28E-02
ALDH1A2	1.081	enzyme		1.937	7.32E-02
HIF1A	1.226	transcription regulator		-1.926	9.55E-02
WNT7A		cytokine		-1.982	1.09E-01
PTHLH	-1.216	other		-1.977	1.27E-01
MAP2K5	-1.004	kinase		-1.969	1.31E-01
JAK2	1.149	kinase		-1.809	1.32E-01
YY1	1.020	transcription regulator		1.961	1.76E-01
AREG/AREGB	-1.039	growth factor		-1.965	1.81E-01
P38 MAPK		group		-1.864	1.89E-01
TREM1	-1.062	transmembrane receptor		-1.999	1.93E-01
PTPN11	-1.060	phosphatase		-1.953	1.98E-01
FGF4	-1.074	growth factor		-1.982	2.08E-01
SMAD7	1.040	transcription regulator		-1.916	2.15E-01
Ras		group		-1.785	2.30E-01
SRC	-1.174	kinase		-1.848	2.30E-01
NOTCH2	1.195	transcription regulator		1.977	2.36E-01
SP1	-1.014	transcription regulator		-1.814	2.40E-01
C/ebp		group		-1.901	2.93E-01
SNAI1	-1.025	transcription regulator		1.878	3.32E-01
miR-133a-3p (and other miRNAs w/seed UUGGUCC)		mature microRNA		1.994	3.54E-01
CAMK4	1.065	kinase		-1.963	4.14E-01
SPHK1	-1.207	kinase		-1.965	4.44E-01
WNT11	-1.119	other		-1.982	4.44E-01
PRKCB	1.108	kinase		-1.969	4.57E-01
MTA1	1.079	transcription regulator		-1.961	5.02E-01
IL27	1.030	cytokine		-1.926	5.20E-01
Gm-csf		group		-1.780	5.47E-01
TRH	-1.104	other		-1.839	5.56E-01
KLF15	-1.067	transcription regulator		1.990	1.00E00
IL12A	-1.049	cytokine		1.981	1.00E00
IL12B	-1.263	cytokine		1.981	1.00E00
SCD	-1.021	enzyme		1.965	1.00E00
PPARD	-1.036	ligand-dependent nuclear receptor		1.957	1.00E00
E2f		group		1.951	1.00E00
GNRH1	-1.155	other		-1.764	1.00E00
TSH		complex		-1.772	1.00E00
TAC1	-1.138	other		-1.778	1.00E00
STAT5B	1.093	transcription regulator		-1.804	1.00E00
HNF1A	-1.181	transcription regulator		-1.807	1.00E00
TNFSF10	1.028	cytokine		-1.870	1.00E00
Nfat (family)		group		-1.914	1.00E00
IKBKE	-1.092	kinase		-1.967	1.00E00
THPO	-1.029	cytokine		-1.969	1.00E00
Tnf (family)		group		-1.980	1.00E00
FIGLA	-1.056	other		-1.982	1.00E00
Gh		cytokine		-1.992	1.00E00

## Sheet:   Sheet F
List of all upstream regulators in the double UBE4B+LSD1 knockdown compared with the control.
Upstream Regulator	Fold Change	Molecule Type	Predicted Activation State	Activation z-Score	p-value of Overlap
TRIB3	-1.174	kinase	Activated	2.135	7.47E-04
miR-155-5p (miRNAs w/seed UAAUGCU)		mature microRNA	Activated	2.113	1.19E-03
TP53	1.155	transcription regulator	Activated	2.013	2.49E-02
Retnlb		other	Activated	2.137	4.92E-02
MAPK14	-1.169	kinase	Activated	2.068	5.21E-02
NKX2-5	-1.254	transcription regulator	Activated	2.400	6.42E-02
INSIG1	-1.463	other	Activated	2.434	9.50E-02
SMARCB1	-1.152	transcription regulator	Activated	2.017	1.26E-01
NR0B2	-1.017	ligand-dependent nuclear receptor	Activated	2.000	2.13E-01
RBL2	1.247	other	Activated	2.549	4.24E-01
IRF1	-1.188	transcription regulator	Activated	2.000	1.00E00
ADIPOQ	-1.013	other	Activated	2.416	1.00E00
FGF8	1.036	growth factor	Inhibited	-2.656	1.20E-03
HOXB3	1.213	transcription regulator	Inhibited	-2.183	1.47E-03
SCAP	1.086	other	Inhibited	-2.762	1.81E-03
SYVN1	-1.063	transporter	Inhibited	-2.449	2.07E-03
SREBF2	-1.300	transcription regulator	Inhibited	-2.745	4.74E-03
MTA1	1.110	transcription regulator	Inhibited	-2.182	6.42E-02
ERBB4	1.295	kinase	Inhibited	-2.058	6.44E-02
Mek		group	Inhibited	-2.194	9.59E-02
SREBF1	-1.004	transcription regulator	Inhibited	-3.203	1.27E-01
MED13	-1.027	transcription regulator	Inhibited	-2.000	1.62E-01
P38 MAPK		group	Inhibited	-2.087	2.67E-01
ERK		group	Inhibited	-2.267	2.75E-01
PDGF BB		complex	Inhibited	-2.160	2.98E-01
MAPK1	-1.032	kinase	Inhibited	-2.523	3.06E-01
SIRT1	1.054	transcription regulator	Inhibited	-2.050	3.23E-01
SP1	-1.038	transcription regulator	Inhibited	-2.249	3.30E-01
TNFSF12	1.129	cytokine	Inhibited	-2.599	4.20E-01
NRG1	1.072	growth factor	Inhibited	-2.201	4.78E-01
CREB1	1.058	transcription regulator	Inhibited	-2.577	4.97E-01
TREM1	-1.035	transmembrane receptor	Inhibited	-2.357	5.06E-01
Immunoglobulin		complex	Inhibited	-2.010	1.00E00
ERK1/2		group	Inhibited	-2.135	1.00E00
SMAD7	-1.006	transcription regulator	Inhibited	-2.599	1.00E00
FOXO4	1.303	transcription regulator		1.817	4.16E-07
miR-21-5p (and other miRNAs w/seed AGCUUAU)		mature microRNA		-0.156	1.39E-06
miR-124-3p (and other miRNAs w/seed AAGGCAC)		mature microRNA		0.661	2.80E-06
SBDS	1.024	other			6.40E-05
miR-291a-3p (and other miRNAs w/seed AAGUGCU)		mature microRNA		0.957	7.37E-05
ALDH2	-1.125	enzyme		1.667	1.22E-04
CD24	-1.045	other		-0.535	1.24E-04
mir-194	-1.072	microRNA			1.57E-04
SIN3A	-1.019	transcription regulator		1.000	2.03E-04
SLC29A1	-1.082	transporter		1.414	2.31E-04
GRHL2	1.060	transcription regulator		-1.633	2.59E-04
CYP1A1	1.372	enzyme		0.788	6.24E-04
NUPR1	-1.204	transcription regulator		0.441	6.83E-04
mir-210	1.023	microRNA		0.836	8.89E-04
SF3B2	1.111	other			1.16E-03
INSIG2	-1.026	other		1.314	1.30E-03
ADRB		group		1.777	1.34E-03
PHF1	1.009	transcription regulator			1.44E-03
estrogen receptor		group		-1.424	2.29E-03
ESRRA	-1.304	ligand-dependent nuclear receptor		-1.474	2.29E-03
MGEA5	1.078	enzyme		1.183	2.48E-03
ZNF217	1.123	transcription regulator		-0.102	2.73E-03
ATP7B	1.154	transporter		-1.897	2.84E-03
miR-1 (and other miRNAs w/seed GGAAUGU)		mature microRNA		0.601	3.08E-03
FSH		complex		1.294	3.23E-03
ETV4	-1.488	transcription regulator		-0.651	3.33E-03
ZFYVE9	1.039	peptidase			3.46E-03
HRAS	-1.178	enzyme		0.372	3.79E-03
mir-103	-1.055	microRNA		-1.103	3.90E-03
MBTPS1	-1.002	peptidase		-0.447	3.90E-03
ERBB2	1.012	kinase		-0.713	3.95E-03
TAZ	-1.129	enzyme			3.96E-03
FOXO3	1.184	transcription regulator		0.054	4.40E-03
L1CAM	1.018	other			4.61E-03
CYP51A1	-1.202	enzyme		1.342	5.84E-03
Lh		complex		-0.693	5.93E-03
RTN4	-1.214	other		1.129	6.17E-03
ZEB2	-1.168	transcription regulator		1.356	6.55E-03
BCAR1	-1.055	enzyme			7.66E-03
MNT	-1.063	transcription regulator			7.66E-03
ATF4	-1.045	transcription regulator		-1.050	7.82E-03
Hoxc9		other			8.01E-03
7S NGF		complex			8.01E-03
UGDH	1.049	enzyme			8.01E-03
PAX7	1.037	transcription regulator		0.970	8.14E-03
ANXA2	-1.105	other		-0.113	8.34E-03
RBM5	1.016	other		-0.240	8.71E-03
POR	-1.001	enzyme		1.996	9.18E-03
TP63	-1.066	transcription regulator		-0.191	9.31E-03
CCND1	-1.371	other		-0.551	9.31E-03
LDL-cholesterol		complex			9.55E-03
SPTLC1	-1.411	enzyme			9.55E-03
ATP1A1	1.090	transporter			9.55E-03
BPTF	-1.004	transcription regulator			9.55E-03
RBBP7	1.020	transcription regulator			9.55E-03
CYP2C9	1.083	enzyme			9.55E-03
SRPK2	1.006	kinase			9.55E-03
MITF	1.066	transcription regulator		-0.696	9.85E-03
HIC1	-1.208	transcription regulator		0.905	1.07E-02
EGF	1.003	growth factor		-1.675	1.09E-02
CDKN2A	-1.004	transcription regulator		0.256	1.12E-02
CTBP2	-1.064	transcription regulator			1.15E-02
CYP7A1	-1.062	enzyme		-1.387	1.15E-02
DRD1	-1.189	G-protein coupled receptor			1.18E-02
HNRNPAB	1.018	enzyme		1.000	1.18E-02
mir-182	1.074	microRNA		0.113	1.23E-02
NPPB	-1.001	other		1.964	1.30E-02
POU5F1	-1.015	transcription regulator		0.056	1.32E-02
HMGA1	-1.118	transcription regulator		1.292	1.34E-02
miR-16-5p (and other miRNAs w/seed AGCAGCA)		mature microRNA		0.106	1.41E-02
HOXD9	-1.095	transcription regulator			1.49E-02
ARID4B	1.003	other			1.49E-02
HOXB1	1.064	transcription regulator			1.49E-02
PHC2	1.059	other			1.49E-02
NPC1L1	-1.077	transporter			1.49E-02
miR-3118 (and other miRNAs w/seed GUGACUG)		mature microRNA			1.49E-02
DLC1	1.087	other			1.49E-02
FGFR4	1.006	kinase			1.49E-02
SNCB	-1.244	other			1.49E-02
ERBB3	1.171	kinase		-1.391	1.52E-02
Cg		complex		-1.940	1.56E-02
GPI	-1.063	enzyme		-0.771	1.71E-02
EPHA2	-1.025	kinase		-1.951	1.71E-02
BRD2	-1.096	kinase			1.75E-02
Pdgf (complex)		complex		-0.803	1.81E-02
PML	1.041	transcription regulator		0.365	1.92E-02
PDGFC	1.124	growth factor		0.351	2.02E-02
CTBP1	1.054	enzyme		-0.063	2.03E-02
CHI3L1	-1.118	enzyme			2.03E-02
mir-155		microRNA		-0.054	2.07E-02
KLF6	-1.172	transcription regulator		0.251	2.07E-02
miR-182-5p (and other miRNAs w/seed UUGGCAA)		mature microRNA		0.000	2.07E-02
EGR2	-1.231	transcription regulator		-0.117	2.19E-02
mir-451		microRNA		0.000	2.37E-02
PEX5L	1.027	ion channel		1.987	2.37E-02
ARID4A	-1.079	transcription regulator			2.41E-02
Actin		group			2.41E-02
MLH1	-1.022	enzyme			2.41E-02
LCAT	1.011	enzyme			2.41E-02
INSR	1.100	kinase		-1.993	2.43E-02
EPAS1	1.146	transcription regulator		-0.488	2.49E-02
miR-200b-3p (and other miRNAs w/seed AAUACUG)		mature microRNA		0.149	2.49E-02
SRC	-1.116	kinase		-1.958	2.56E-02
HOXD3	-1.053	transcription regulator		0.440	2.57E-02
Ctbp		group		-1.067	2.57E-02
NOC2L	-1.074	transcription regulator			2.68E-02
KIRREL	1.158	other			2.68E-02
NPHS1	-1.207	other			2.68E-02
NPHS2	-1.106	other			2.68E-02
NUDT2	-1.065	phosphatase			2.68E-02
HTR6	-1.211	G-protein coupled receptor			2.68E-02
SERPINA3	-1.106	other			2.68E-02
MEG3	-1.038	other			2.68E-02
NAA30	1.018	other			2.68E-02
Sirt1		transcription regulator			2.68E-02
EEF1D	-1.179	translation regulator			2.68E-02
LCOR	-1.134	transcription regulator			2.68E-02
IQGAP2	-1.124	other			2.68E-02
RALGDS	1.031	other			2.68E-02
EMP2	1.189	other			2.68E-02
MZB1	1.119	other			2.68E-02
SIGMAR1	1.021	G-protein coupled receptor			2.68E-02
RB1	1.085	transcription regulator		0.059	2.76E-02
RNF2	-1.031	transcription regulator			3.02E-02
mir-144	1.012	microRNA		0.000	3.17E-02
TBX3	1.044	transcription regulator		-0.152	3.17E-02
MAPK8IP1	-1.165	other		0.152	3.17E-02
TP73	1.048	transcription regulator		1.495	3.43E-02
BRD4	1.021	kinase		0.585	3.46E-02
Hdac		group		-0.750	3.46E-02
SOX2	1.048	transcription regulator		-0.899	3.56E-02
miR-30c-5p (and other miRNAs w/seed GUAAACA)		mature microRNA		0.361	3.57E-02
ATG5	1.114	other			3.59E-02
BMI1	1.022	transcription regulator			3.71E-02
AGT	-1.052	growth factor		-0.619	3.73E-02
ZBTB16	1.040	transcription regulator		1.840	3.74E-02
NFYB	-1.121	transcription regulator			3.82E-02
NRIP1	1.163	transcription regulator		0.816	3.87E-02
SIN3B	1.036	transcription regulator			4.10E-02
ACACB	1.008	enzyme		0.762	4.10E-02
ETV5	-1.443	transcription regulator		1.067	4.23E-02
KMT2A	-1.055	transcription regulator		-1.000	4.27E-02
IGF2	1.123	growth factor		0.000	4.34E-02
ATN1	1.024	transcription regulator			4.68E-02
HTT	-1.004	transcription regulator		-1.252	4.76E-02
Collagen type I		complex		0.972	4.79E-02
MYC	1.029	transcription regulator		0.303	4.89E-02
CCL5	-1.080	cytokine		0.000	4.92E-02
PI3K (family)		group		0.548	4.96E-02
PPARGC1B	-1.074	transcription regulator		-0.926	4.96E-02
KISS1	-1.192	other			5.00E-02
GBX2	-1.300	transcription regulator			5.00E-02
TARDBP	-1.007	transcription regulator			5.00E-02
RFX2	1.053	transcription regulator			5.00E-02
Fgf		group			5.00E-02
HBEGF	1.137	growth factor		-0.555	5.00E-02
YBX1	1.049	transcription regulator		1.314	5.00E-02
FGF4	1.018	growth factor		-1.982	1.08E-01
PTEN	-1.115	phosphatase		1.841	1.48E-01
RPS6KB1	1.069	kinase		-1.941	1.62E-01
GLI1	-1.034	transcription regulator		-1.949	2.29E-01
SHH	1.035	peptidase		-1.968	2.63E-01
WNT11	-1.026	other		-1.969	2.68E-01
Jnk		group		-1.890	2.68E-01
PTHLH	-1.285	other		-1.982	3.09E-01
MDM2	1.315	transcription regulator		-1.881	3.52E-01
XDH	1.047	enzyme		-1.964	3.60E-01
ERG	1.013	transcription regulator		1.897	4.05E-01
Collagen(s)		complex		1.982	4.28E-01
AVP		other		1.980	4.51E-01
EIF4E	-1.102	translation regulator		-1.998	5.32E-01
REST	1.255	transcription regulator		1.938	1.00E00
CFTR	1.032	ion channel		1.982	1.00E00
FOXA2	-1.048	transcription regulator		-1.777	1.00E00
CYP19A1	-1.177	enzyme		-1.969	1.00E00
